# Supplementary material for: Diazaboroles with quinone units: hydrogen bonding network and n-type FETs involving a three-coordinate boron atom
Source: Royal Society of Chemistry journal article supplement (doi:10.1039/c1jm12650d), 2011-01-01
Supplement: c1jm12650d.pdf [file c1jm12650d.pdf]

# Supporting Information

## Diazaboroles with quinone units: hydrogen bonding network and n-type FETs involving a three-coordinate boron atom

Jun-ichi Nishida,<sup>a</sup> Tomohiro Fujita,<sup>a</sup> Yoshihide Fujisaki,<sup>b</sup>  
Shizuo Tokito<sup>b</sup> and Yoshiro Yamashita\*<sup>a</sup>

<sup>a</sup>Department of Electronic Chemistry, Interdisciplinary Graduate School of Science and Engineering, Tokyo Institute of Technology, Nagatsuta, Midori-ku, Yokohama 226-8502, Japan.

<sup>b</sup>NHK Science and Technical Research Laboratories, Kinuta, Setagaya-ku, Tokyo 157-8510, Japan.

E-mail: yoshiro@echem.titech.ac.jp

### Contents

1. FT-IR data (ATR method)
2. NMR data
3. X-ray structure analysis
4. UV-Vis data
5. Redox potentials
6. DFT calculations
7. FET characteristics
8. XRD patterns
9. AFM measurements

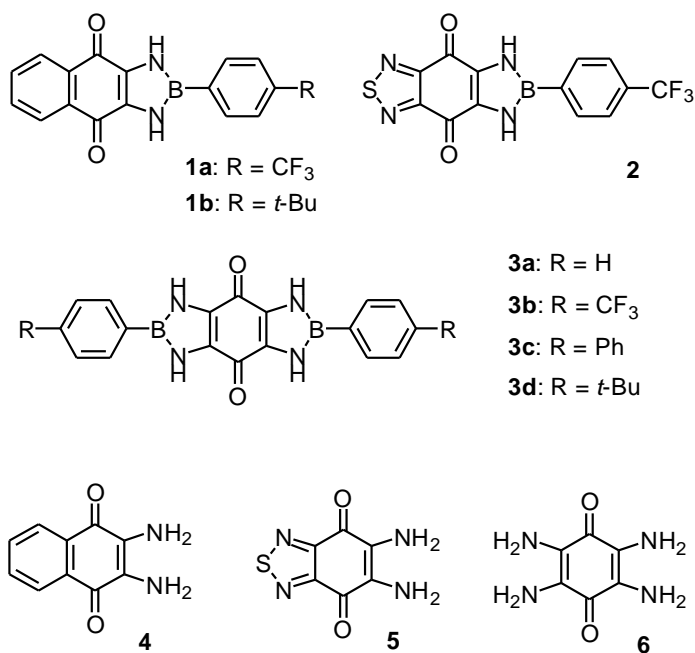

## Lists of compounds

### 1. FT-IR data (ATR method: ZnSe)

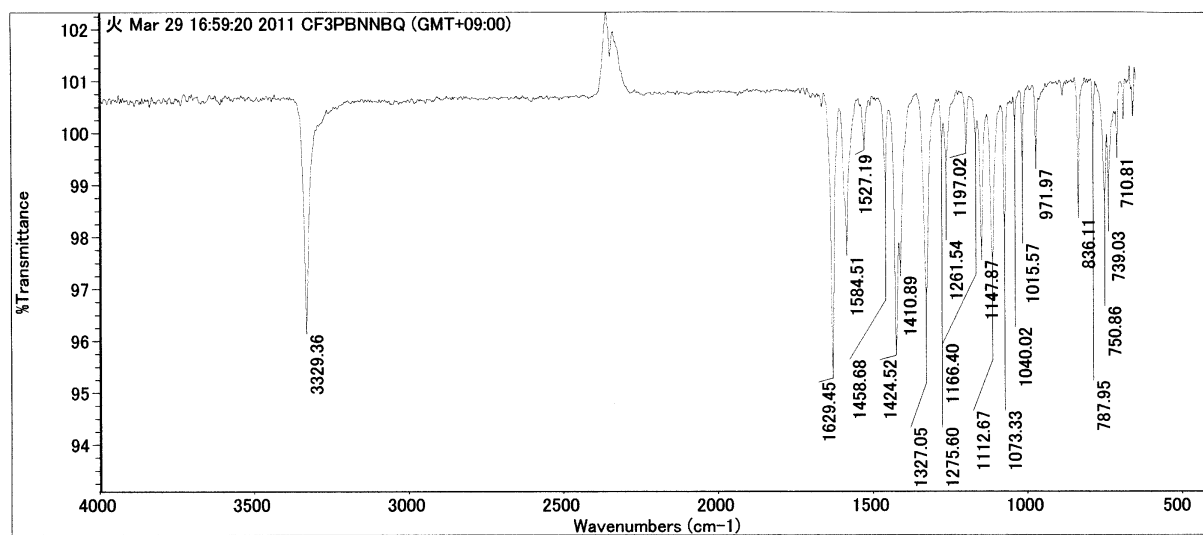

Figure S1-1. FT-IR data of **1a**.

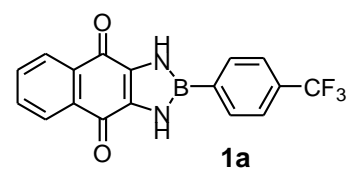

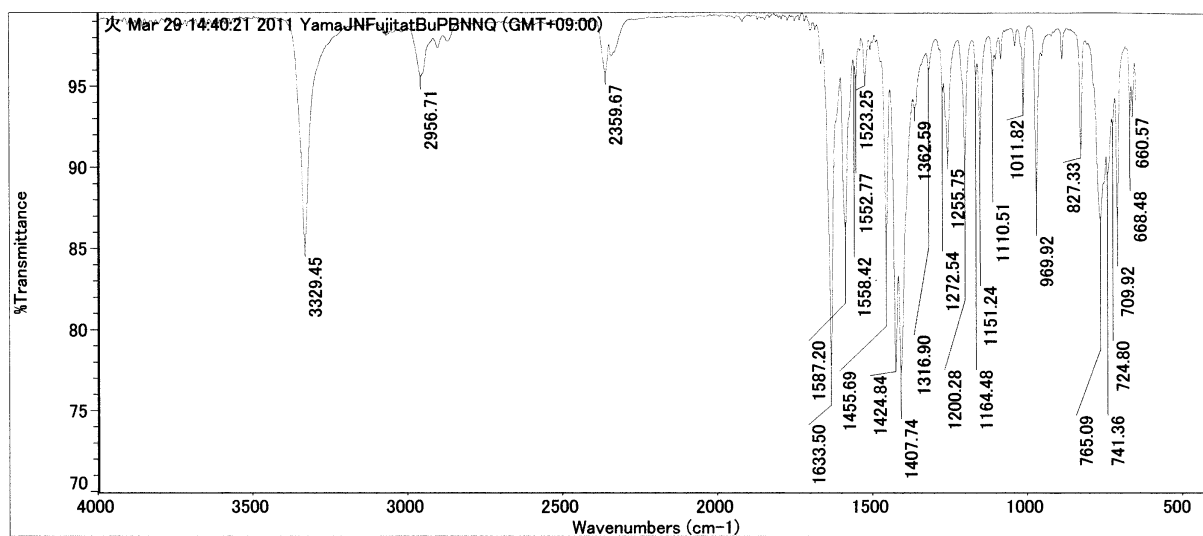

Figure S1-2. FT-IR data of **1b**.

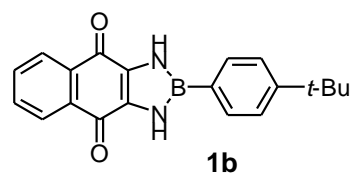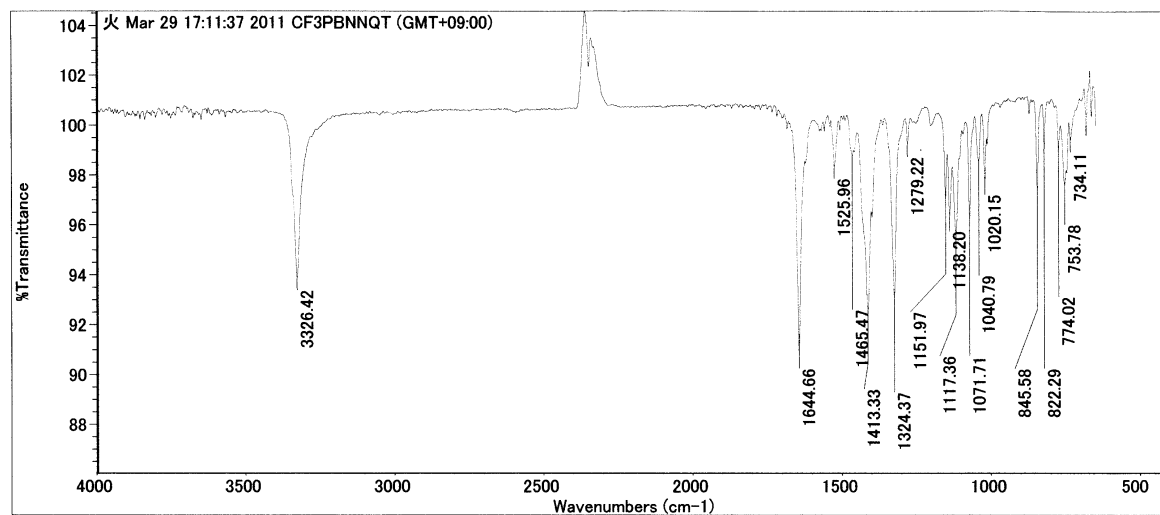

Figure S1-3. FT-IR data of **2**.

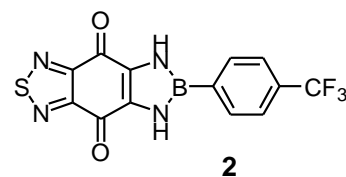

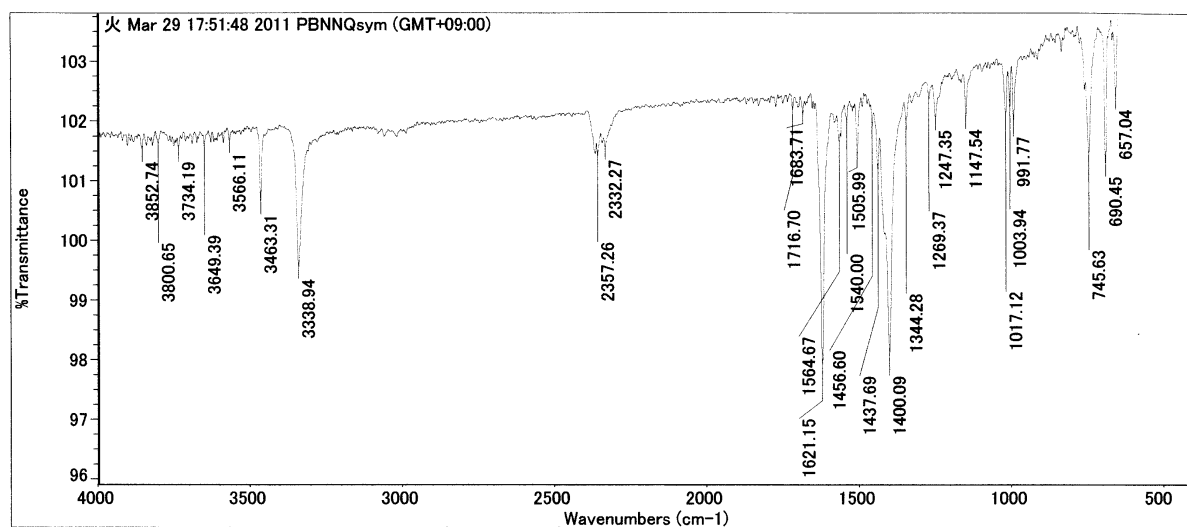

Figure S1-4. FT-IR data of **3a**.

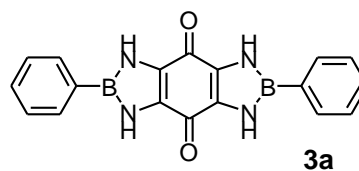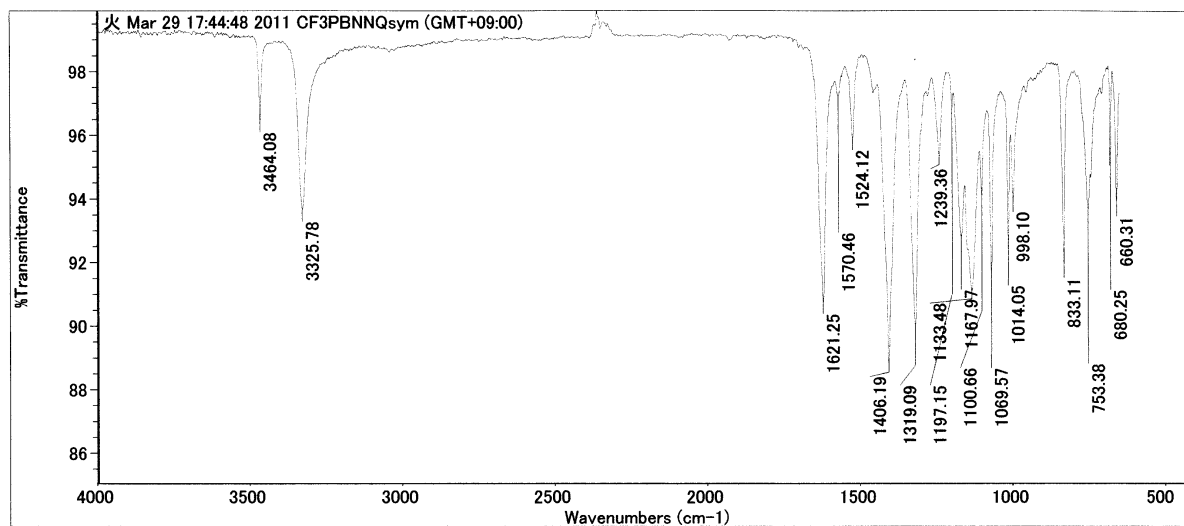

Figure S1-5. FT-IR data of **3b**.

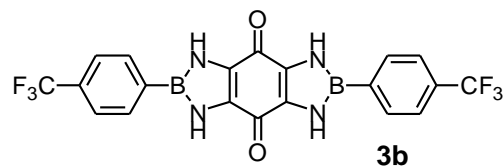

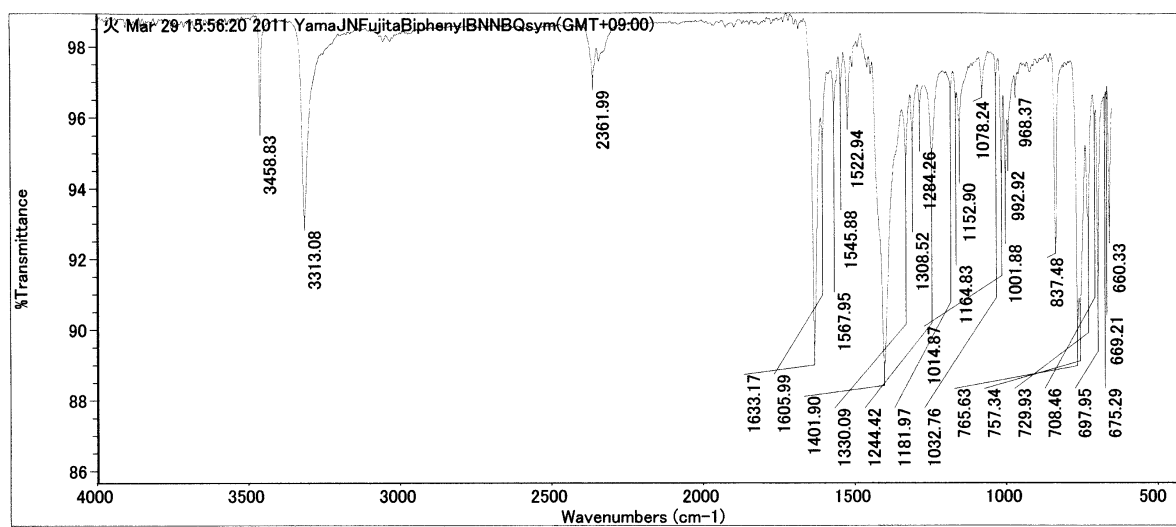

Figure S1-6. FT-IR data of **3c**.

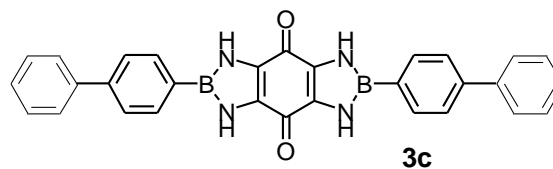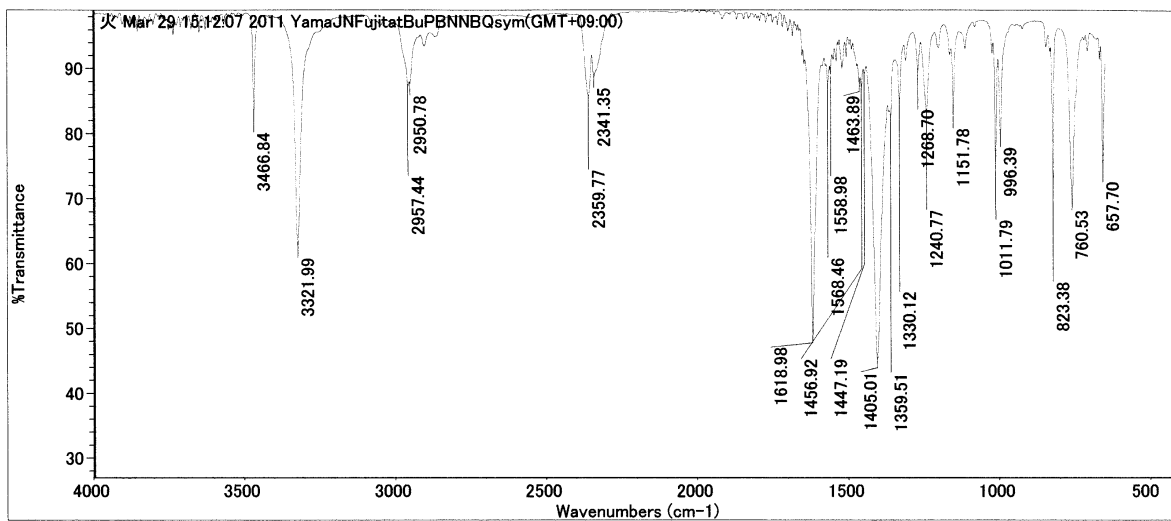

Figure S1-7. FT-IR data of **3d**.

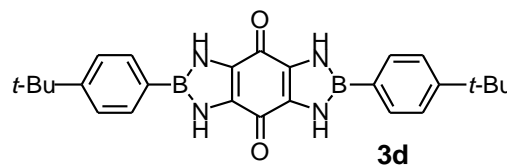

## 2. NMR data (In DMSO: rt)

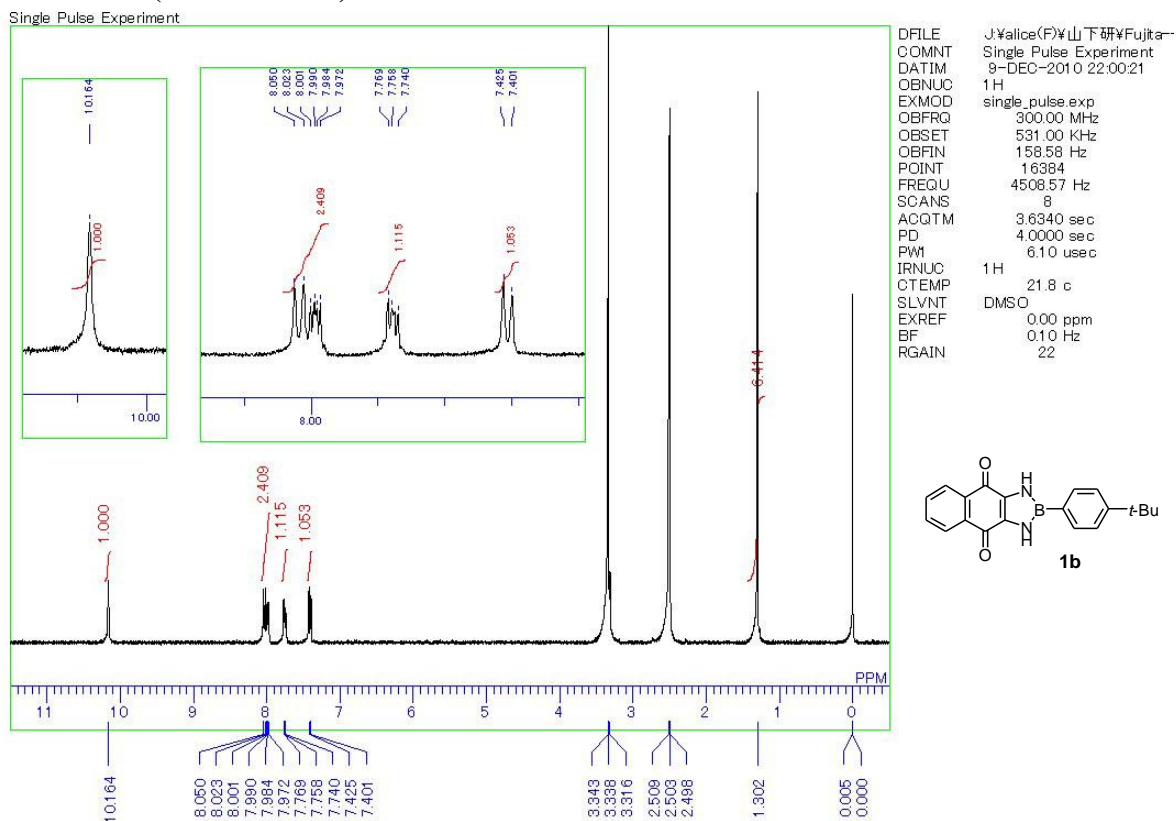

Figure S2-1. NMR data of *t*-butyl derivative **1b**.

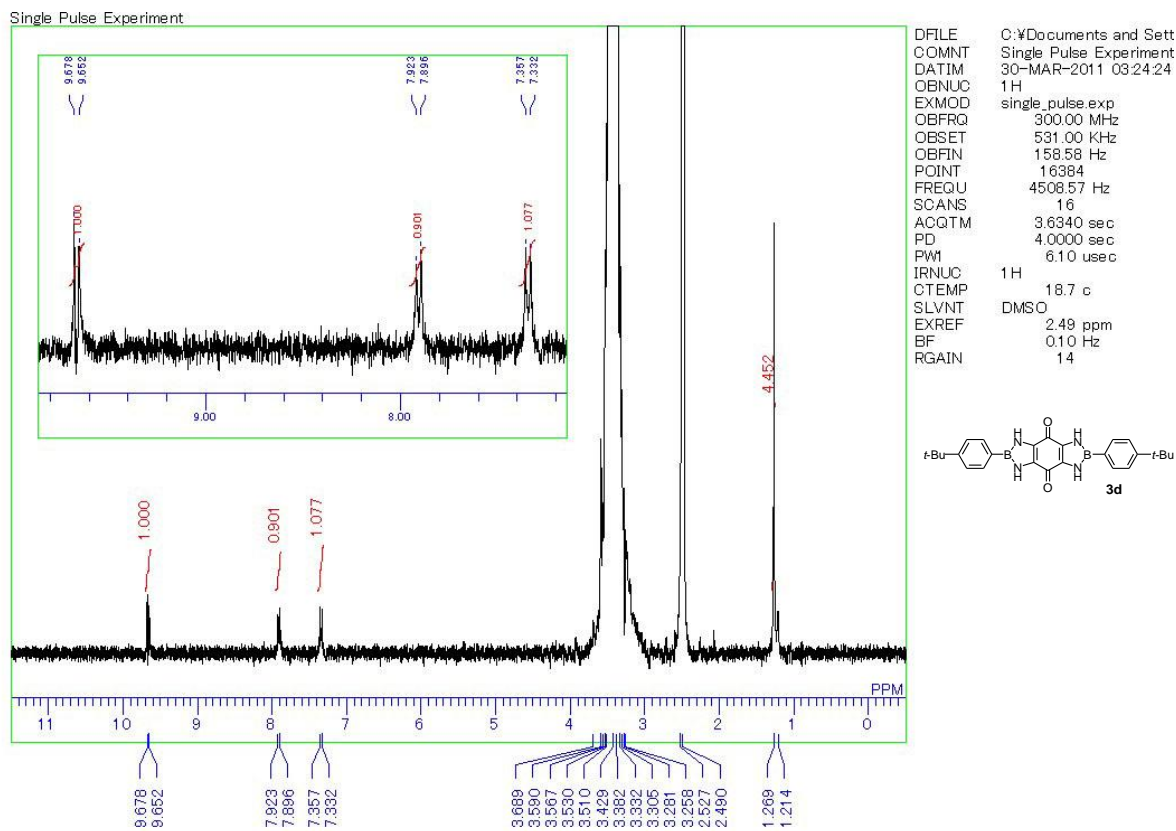

Figure S2-2. NMR data of *t*-butyl derivative **3d**.

### 3. X-ray analysis

X-ray measurement of single crystal of **1a** was carried out using a RAXIS-RAPID imaging plate diffractometer with Mo-K $\alpha$  radiation ( $\lambda = 0.71075 \text{ \AA}$ ) at  $-180.0 \text{ }^\circ\text{C}$ . The structure was solved by the direct method (SIR2004) and refined by the full-matrix least-squares method on  $F^2$ . The non-hydrogen atoms were refined anisotropically. Hydrogen atoms were refined using the riding model. Absorption correction was applied using an empirical procedure. All calculations were performed using the CrystalStructure crystallographic software package except for refinement, which was performed using SHELXL-97. **Crystal data for 1a:**  $\text{C}_{17}\text{H}_{10}\text{N}_2\text{O}_2\text{F}_3\text{B}_2$ ,  $M = 342.08$ , red platelet, crystal dimensions  $0.70 \times 0.70 \times 0.15 \text{ mm}$ , triclinic, space group  $P-1$ ,  $a = 5.5337(12)$ ,  $b = 7.9622(19)$ ,  $c = 16.321(3) \text{ \AA}$ ,  $\alpha = 101.835(6)$ ,  $\beta = 94.236(7)$ ,  $\gamma = 93.967(6)$ ,  $V = 699.3(3) \text{ \AA}^3$ ,  $Z = 2$ ,  $D_c = 1.625 \text{ g cm}^{-3}$ , 6507 reflections collected, 3115 independent ( $R_{int} = 0.049$ ),  $\text{GOF} = 1.022$ ,  $R_1 = 0.1265$  ( $I > 2.00\sigma(I)$ ),  $wR_2 = 0.3359$  for all reflections.

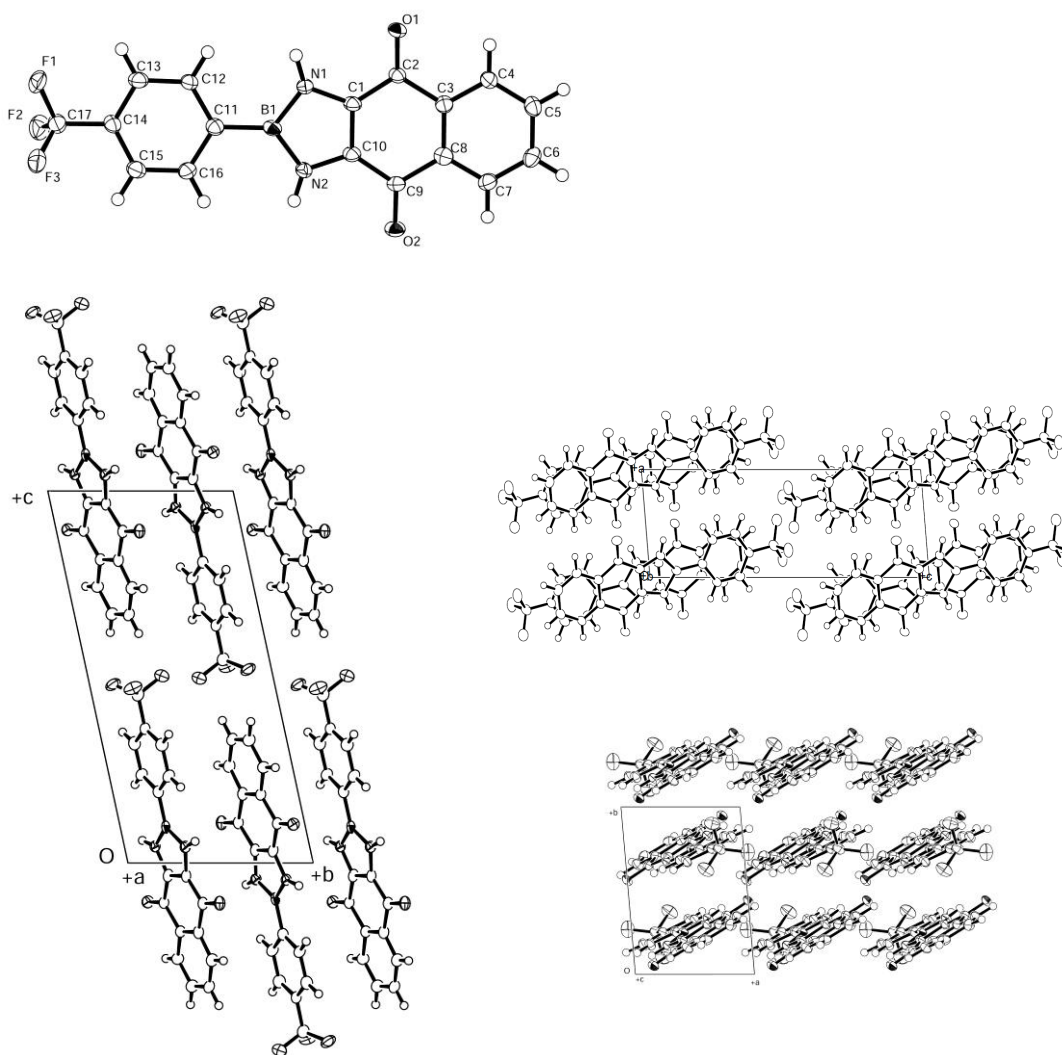

**Figure S3.** Crystal structures of compound **1a**.

#### 4. UV-Vis data

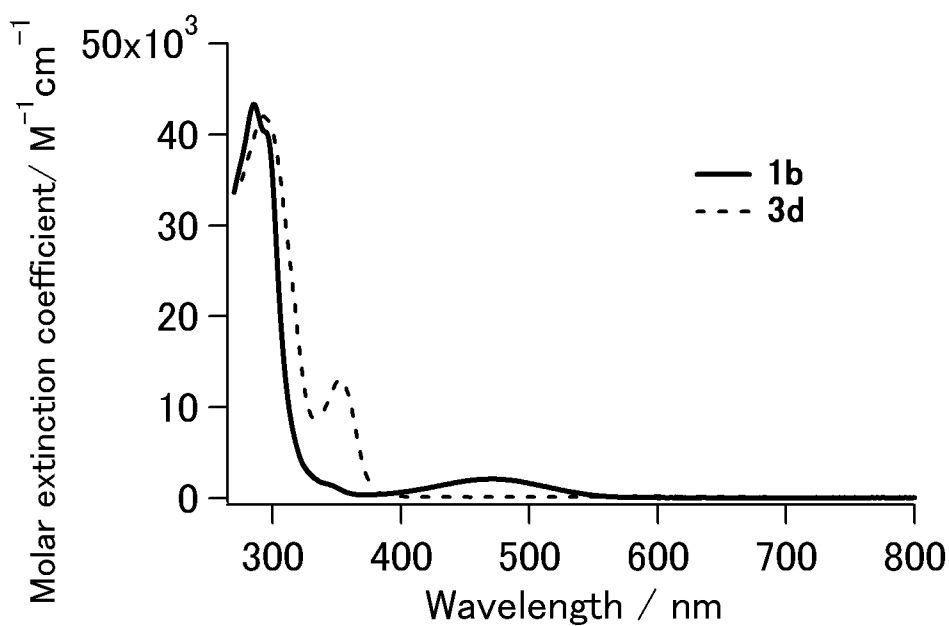

**Figure S4-1.** UV-Vis spectra of *t*-butyl derivatives **1b** and **3d** in DMF.

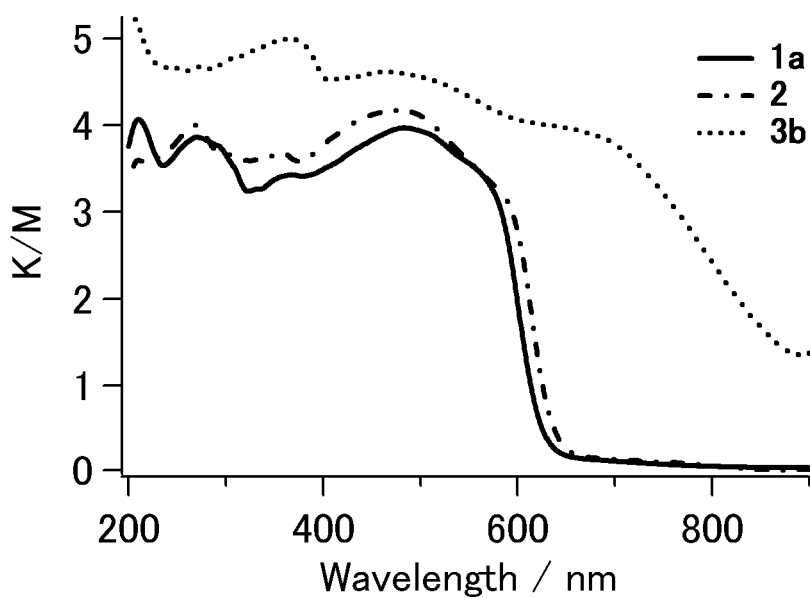

**Figure S4-2.** Reflection spectra of **1a**, **2** and **3b** in solid states after K-M transformation.



## 5. Redox potentials

(a)

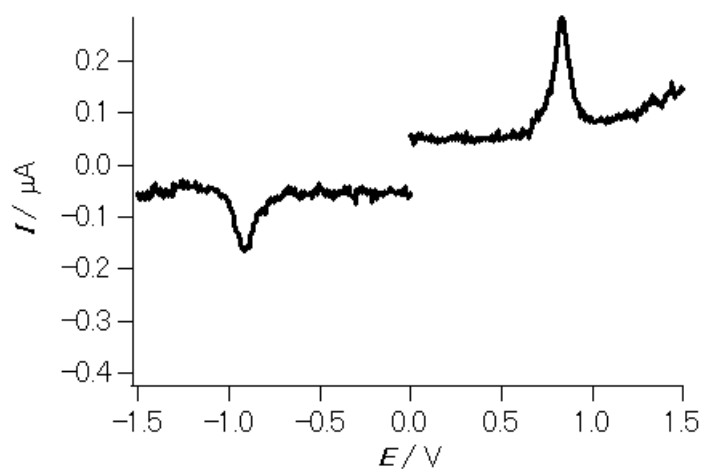

(b)

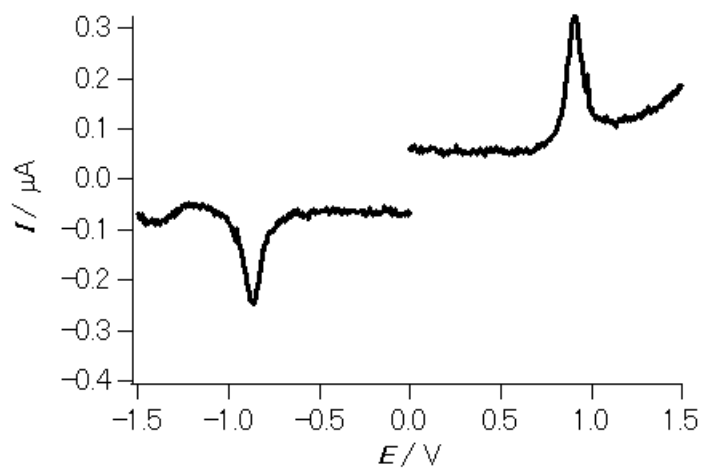

(c)

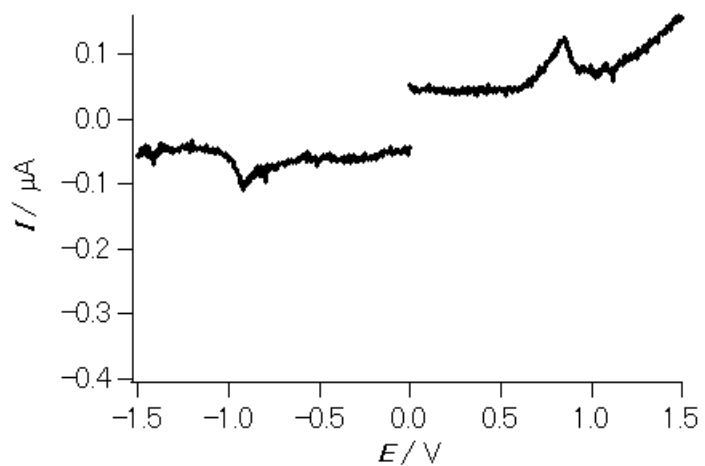

**Figure S5.** Differential pulse voltammograms of (a) **3a**, (b) **3b** and (c) **3c**. 0.1 M *n*-Bu<sub>4</sub>NPF<sub>6</sub> in DMF, Pt electrode, scan rate 20 mV s<sup>-1</sup>, V vs SCE.

## 6. DFT calculations

B3LYP/6-31G(d) level using the Gaussian program 03

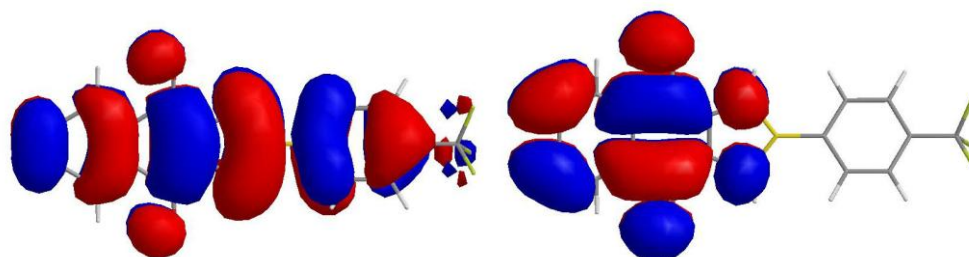

**Figure S6-1.** HOMO (6.15 eV: left) and LUMO (2.93 eV: right) of **1a**.

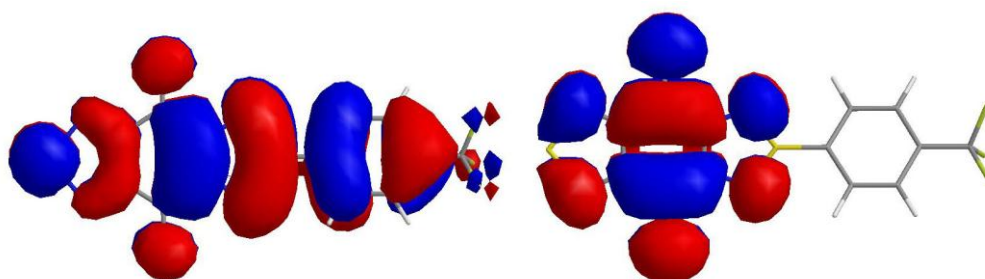

**Figure S6-2.** HOMO (6.53 eV: left) and LUMO (3.27 eV: right) of **2**.

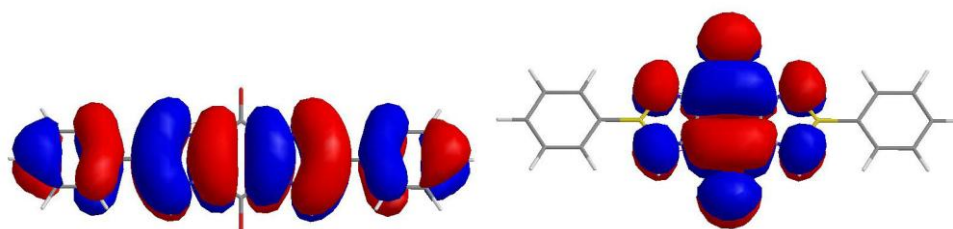

**Figure S6-3.** HOMO (5.34 eV: left) and LUMO (2.78 eV: right) of **3a**.

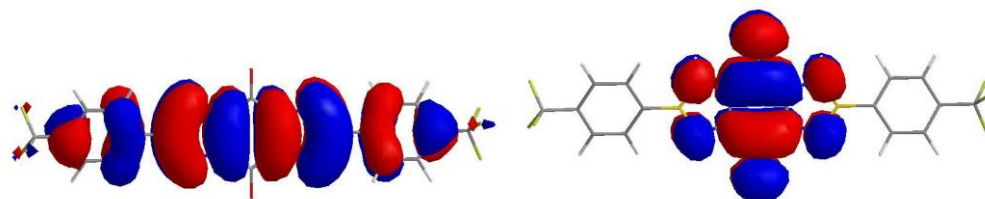

**Figure S6-4.** HOMO (5.74 eV: left) and LUMO (3.09 eV: right) of **3b**.

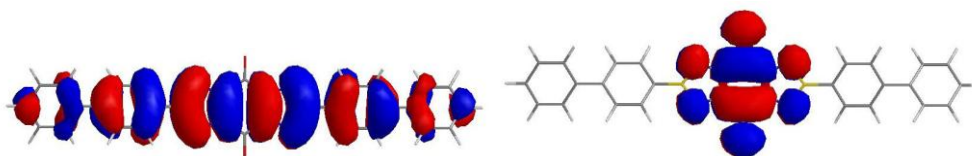

**Figure S6-5.** HOMO (5.30 eV: left) and LUMO (2.79 eV: right) of **3c**.

### DFT calculations of the tautomeric forms of **1a**

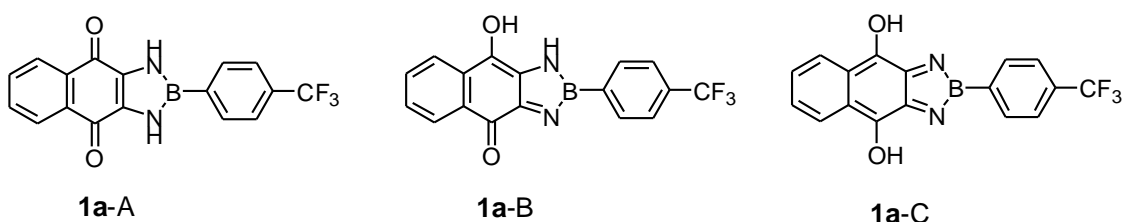

**Table S1.** Single point energy<sup>1</sup> of the tautomeric forms of **1a**.

|             | Single point energy (Hartree) | Difference (Kcal mol <sup>-1</sup> ) | HOMO (eV) | LUMO (eV) |
|-------------|-------------------------------|--------------------------------------|-----------|-----------|
| <b>1a-A</b> | -1238.28400                   | 0                                    | 6.15      | 2.93      |
| <b>1a-B</b> | -1238.22218                   | 38.8                                 | 6.02      | 3.14      |
| <b>1a-C</b> | -1238.15535                   | 80.7                                 | 5.00      | 4.08      |

1) B3LYP/6-31G(d) levels of theory. 1 Hartree = 27.2 eV = 627.51 Kcal mol<sup>-1</sup>.

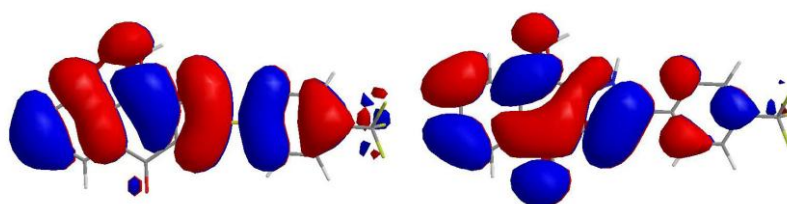

**Figure S6-6.** HOMO (6.02 eV: left) and LUMO (3.14 eV: right) of the tautomeric form of **1a-B**.

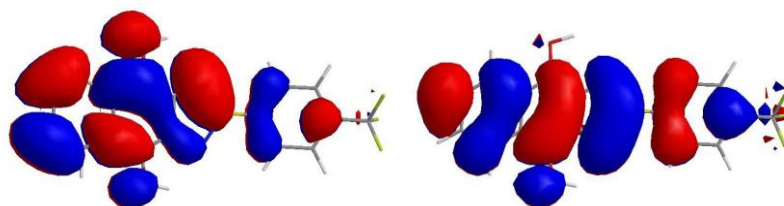

**Figure S6-7.** HOMO (5.00 eV: left) and LUMO (4.08 eV: right) of the tautomeric form of **1a-C**.

## DFT calculations of the dimer form of **1a**

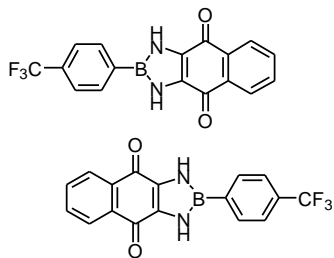

**Table 2.** Single point energy of the dimer forms of **1a**.

|                                                     | Single point energy (Hartree) | HOMO (eV) | LUMO (eV) |
|-----------------------------------------------------|-------------------------------|-----------|-----------|
| Optimized <b>1a-1a'</b> <sup>1</sup><br>(Input CIF) | -2476.58964                   | 6.11      | 3.16      |
| Dimer <b>1a-1a'</b> (CIF)                           | -2476.24639                   | 6.18      | 3.11      |
| Monomer <b>1a</b> (CIF)                             | -1238.11350                   | 6.21      | 2.92      |

1) B3LYP/6-31G(d)//B3LYP/6-31G(d) level of theory.

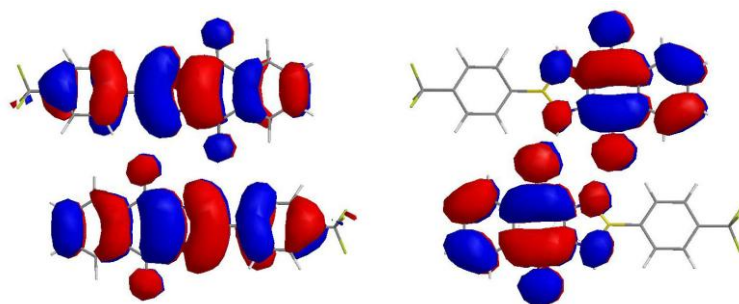

**Figure S6-8.** HOMO (6.11 eV: left) and LUMO (3.16 eV: right) of the dimer form of **1a-1a** optimized at B3LYP/6-31G(d) level using the CIF file as input.

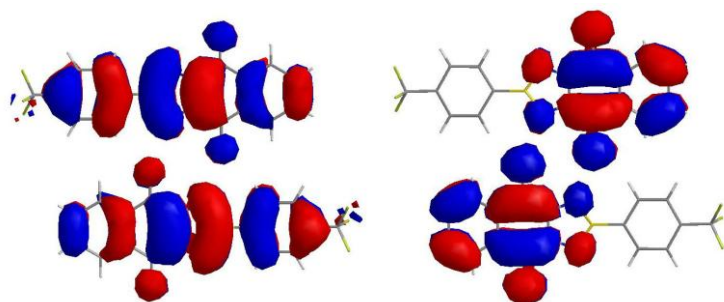

**Figure S6-9.** HOMO (6.18 eV: left) and LUMO (3.11 eV: right) of the dimer form of **1a-1a** using the CIF file.

### DFT calculation of 2,6-Diphenyl-1H,5H-pyrrolo[2,3-f]indole-4,8-dione

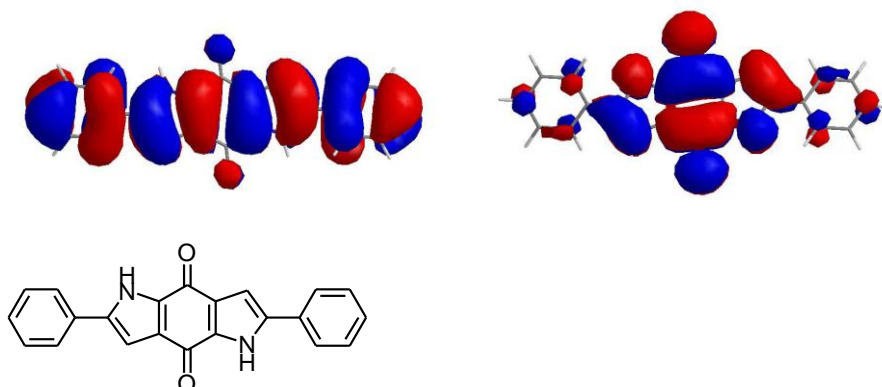

**Figure S6-10.** HOMO (5.58 eV: left) and LUMO (2.46 eV: right) of 2,6-Diphenyl-1H,5H-pyrrolo[2,3-f]indole-4,8-dione having an isoelectric structure.

## 7. FET characteristics

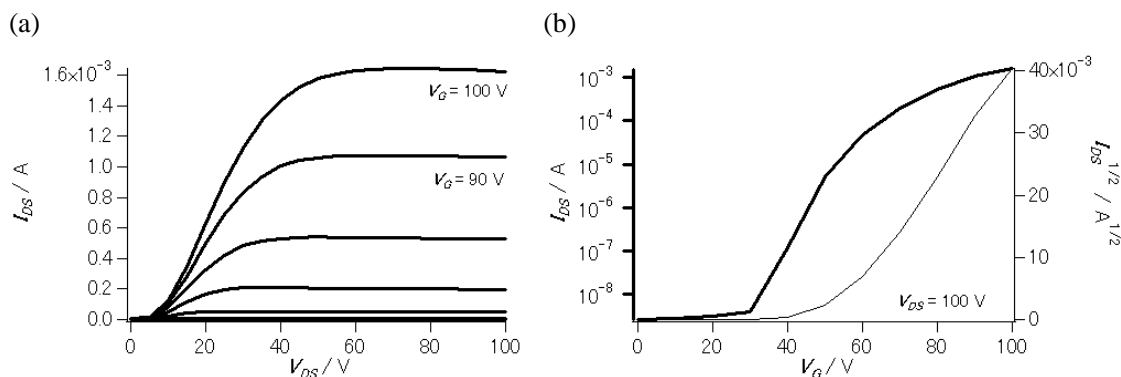

**Figure S7-1.** (a) Output characteristics of bottom-contact FET **1a** ( $T_{\text{sub}} = 20\text{ }^{\circ}\text{C}$ , HMDS treated surface). (b) Transfer characteristics of the same device **1a** (right). The mobility calculated in the saturation regime is  $8.8 \times 10^{-3}\text{ cm}^2\text{ V}^{-1}\text{ s}^{-1}$ .

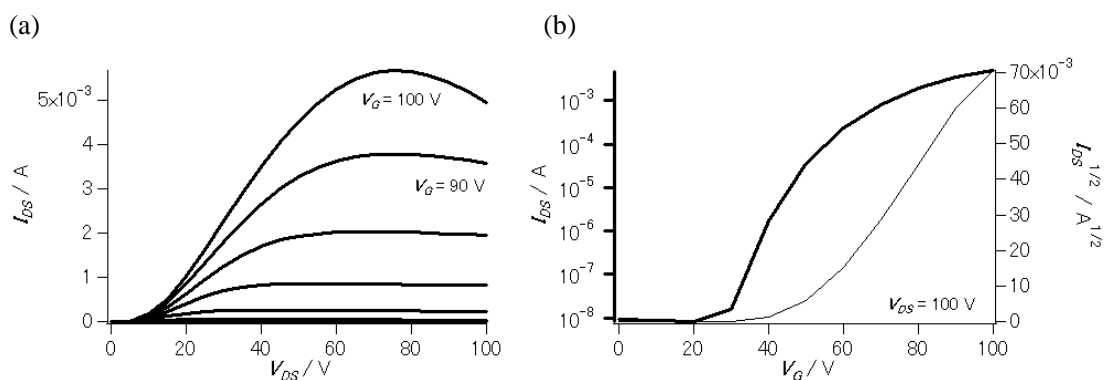

**Figure S7-2.** (a) Output characteristics of bottom-contact FET **1a** ( $T_{\text{sub}} = 100\text{ }^{\circ}\text{C}$ , HMDS treated surface). (b) Transfer characteristics of the same device **1a** (right). The mobility calculated in the saturation regime is  $3.9 \times 10^{-2}\text{ cm}^2\text{ V}^{-1}\text{ s}^{-1}$ .

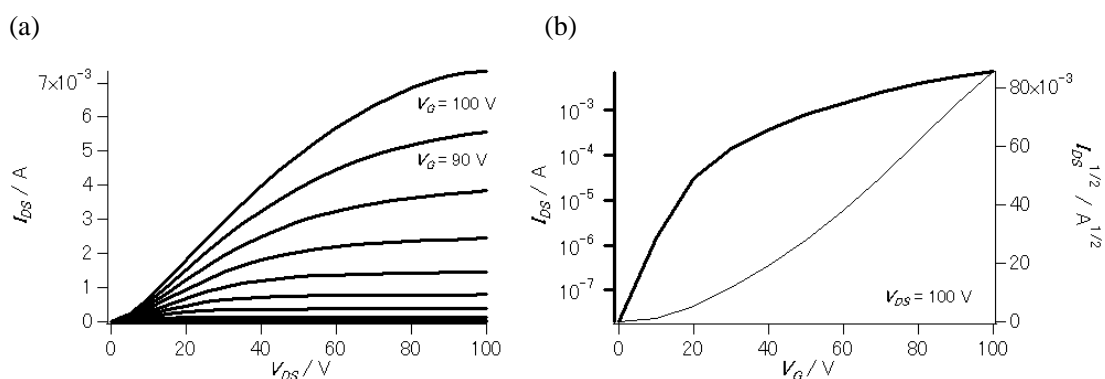

**Figure S7-3.** (a) Output characteristics of bottom-contact FET **2** ( $T_{\text{sub}} = 20\text{ }^{\circ}\text{C}$ , HMDS treated surface). (b) Transfer characteristics of the same device **2** (right). The mobility calculated in the saturation regime is  $3.7 \times 10^{-2}\text{ cm}^2\text{ V}^{-1}\text{ s}^{-1}$ .

**Table S3.** Air stability of a bottom-contact FET **2**.

| compd.              | $T_{\text{sub}}$<br>(degree) | mobility<br>( $\text{cm}^2/\text{Vs}$ ) | on/off          | threshold<br>(V) |
|---------------------|------------------------------|-----------------------------------------|-----------------|------------------|
| <b>2</b> (in vacuo) | 20                           | $n: 3.7 \times 10^{-2}$                 | $6 \times 10^5$ | +38              |
| <b>2</b> (air 1 h)  |                              | $n: 3.3 \times 10^{-3}$                 | $3 \times 10^4$ | +16              |
| <b>2</b> (air 1 d)  |                              | $n: 8.3 \times 10^{-6}$                 | $2 \times 10^4$ | +10              |

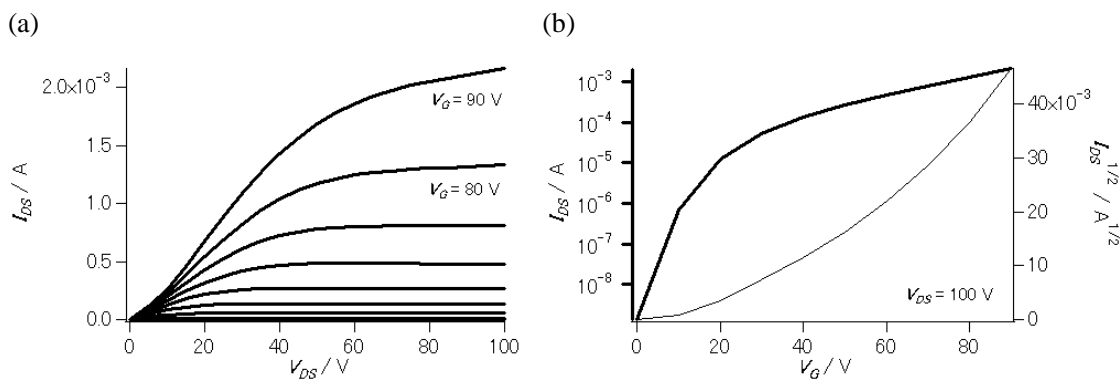

**Figure S7-4.** (a) Output characteristics of bottom-contact FET **3b** ( $T_{\text{sub}} = 20 \text{ }^\circ\text{C}$ , HMDS treated surface). (b) Transfer characteristics of the same device **3b**. The mobility calculated in the saturation regime is  $1.5 \times 10^{-2} \text{ cm}^2 \text{ V}^{-1} \text{ s}^{-1}$ .

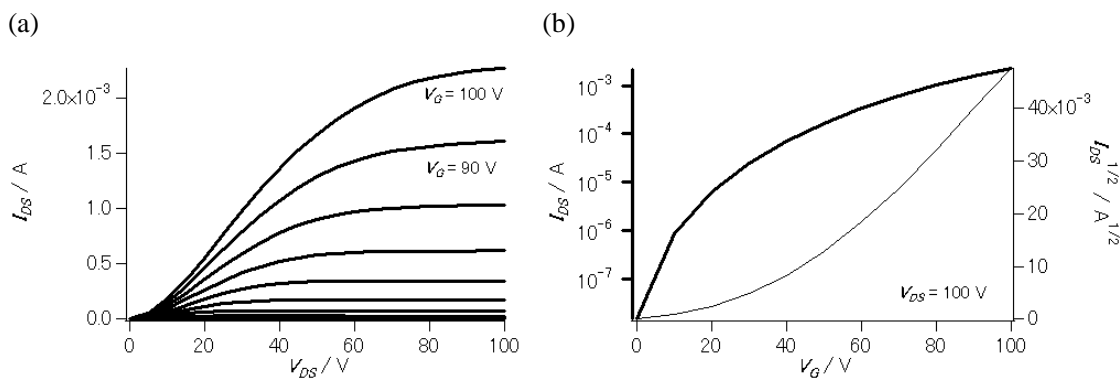

**Figure S7-5.** (a) Output characteristics of bottom-contact FET **3b** ( $T_{\text{sub}} = 50 \text{ }^\circ\text{C}$ , HMDS treated surface). (b) Transfer characteristics of the same device **3b**. The mobility calculated in the saturation regime is  $7.8 \times 10^{-3} \text{ cm}^2 \text{ V}^{-1} \text{ s}^{-1}$ .

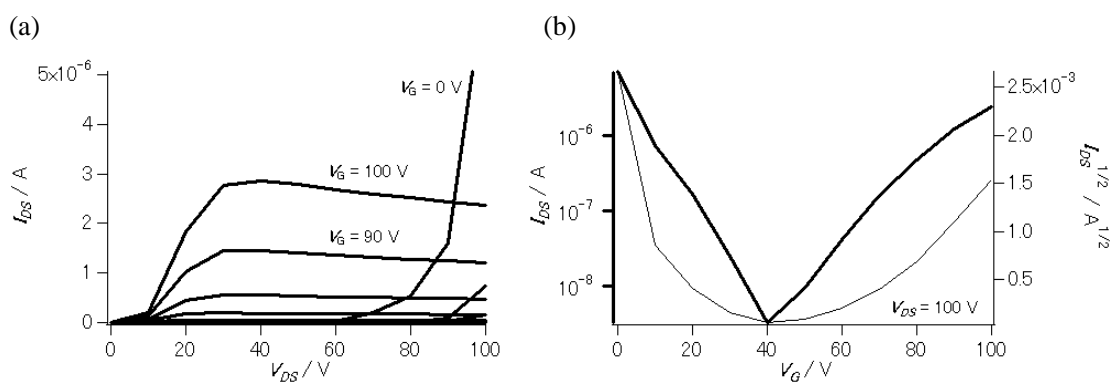

**Figure S7-6.** (a) n-Type output characteristics of **3c** and (b) transfer characteristics of **3c** ( $T_{\text{sub}} = 20$  °C, HMDS treated surface). The mobility calculated in the saturation regime is  $2.3 \times 10^{-5} \text{ cm}^2 \text{ V}^{-1} \text{ s}^{-1}$ .

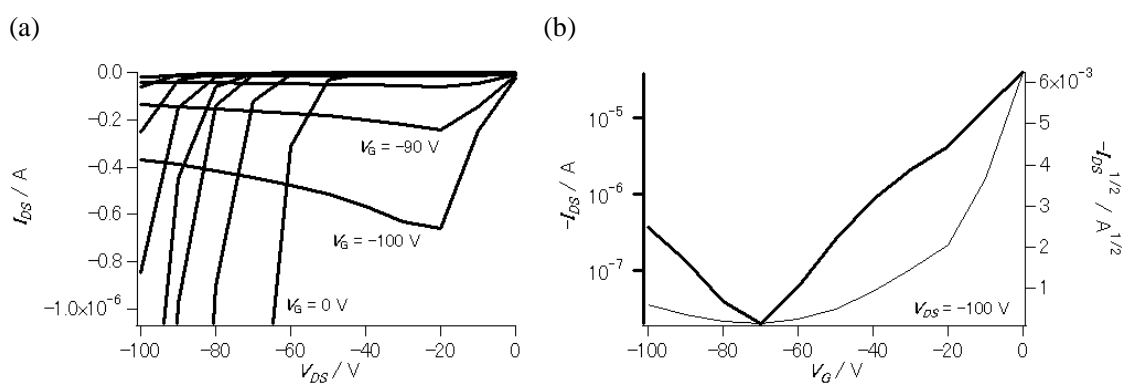

**Figure S7-7.** (a) p-Type output characteristics of **3c** and (b) transfer characteristics of **3c** ( $T_{\text{sub}} = 20$  °C, HMDS treated surface). The mobility calculated in the saturation regime is  $1.5 \times 10^{-5} \text{ cm}^2 \text{ V}^{-1} \text{ s}^{-1}$ .



## 8. XRD patterns

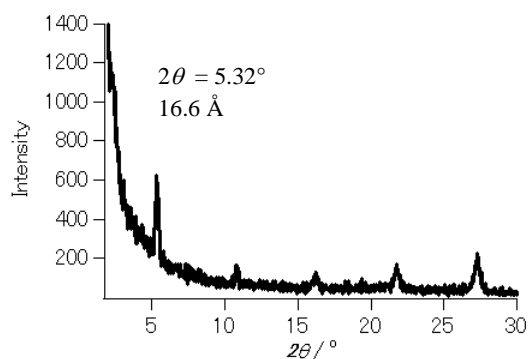

**Figure S8-1.** X-ray diffractogram of 50 nm films of **1a** at  $T_{\text{sub}} = 20 \text{ }^\circ\text{C}$  on HMDS treated surfaces.

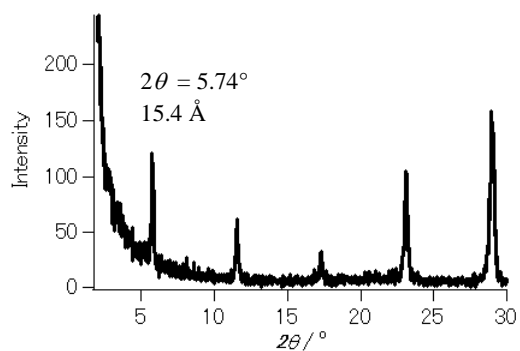

**Figure S8-2.** X-ray diffractogram of 50 nm films of **2** at  $T_{\text{sub}} = 20 \text{ }^\circ\text{C}$  on HMDS treated surfaces.

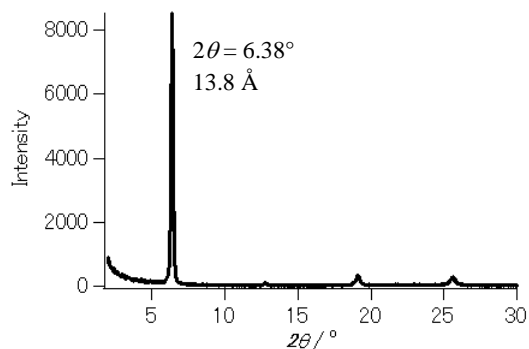

**Figure S8-3.** X-ray diffractogram of 50 nm film of **3a** deposited at  $T_{\text{sub}} = 20 \text{ }^\circ\text{C}$  on a HMDS treated surface.

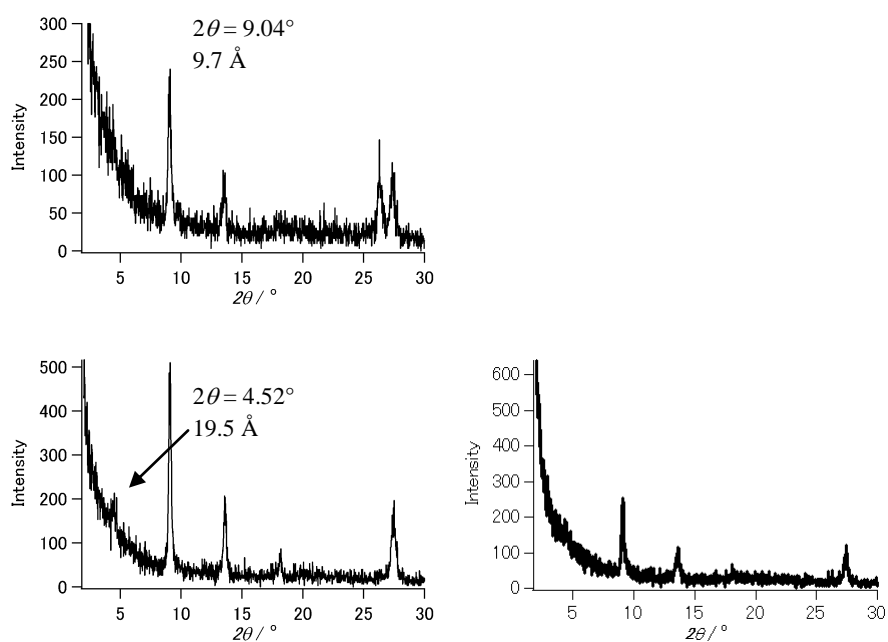

**Figure S8-4.** X-ray diffractograms of 50 nm films of **3b** deposited at  $T_{\text{sub}} = 20^\circ\text{C}$  on a HMDS treated surface (top), at  $50^\circ\text{C}$  on a untreated surface (left) at  $50^\circ\text{C}$  on a HMDS treated surface (right).

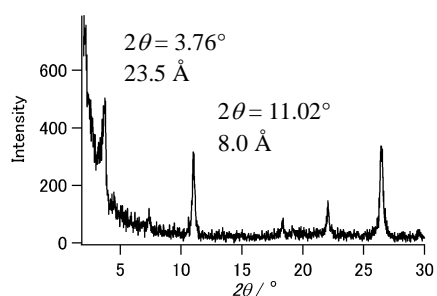

**Figure S8-5.** X-ray diffractogram of 50 nm film of **3c** deposited at  $T_{\text{sub}} = 20^\circ\text{C}$  on a HMDS treated surface.

## 9. AFM measurements

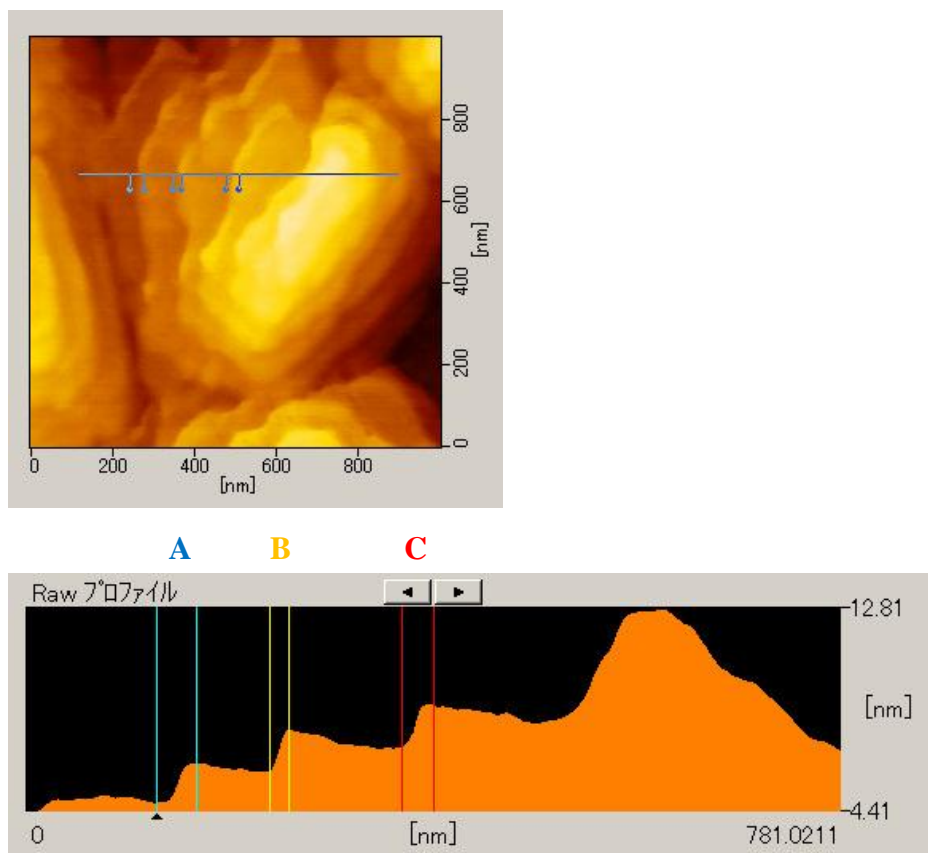

|   | Z1 [nm] | Z2 [nm] | Vertical interval [nm] | Distance [nm] | Angular difference |
|---|---------|---------|------------------------|---------------|--------------------|
| A | 7.181   | 8.870   | 1.688                  | 30.516        | 3.167              |
| B | 6.162   | 7.860   | 1.697                  | 18.310        | 5.297              |
| C | 4.853   | 6.506   | 1.653                  | 38.145        | 2.482              |

**Figure S9-1.** AFM images of 50 nm film of compound **1a** deposited at  $T_{\text{sub}} = 100$  °C on a HMDS treated substrate.

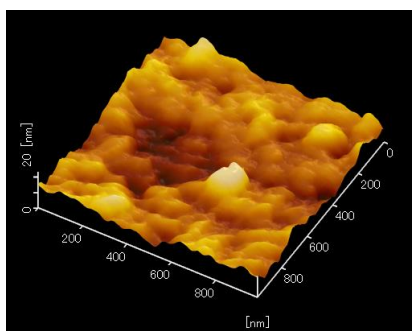

**Figure S9-2.** AFM image of 50 nm film of compound **3b** deposited at  $T_{\text{sub}} = 20$  °C.
